# Supplementary material for: Hydrophobin Film Structure for HFBI and HFBII and Mechanism for Accelerated Film Formation
Source: PubMed Central journal article supplement (PMC4117420; doi:10.1371/journal.pcbi.1003745), 2014-07-31
Supplement: pcbi.1003745.s003.pdf [file pcbi.1003745.s003.pdf]

### Supporting Information, Supplementary tables:

| <b>Image statistics<br/>(projection structure)</b> | <b>Image 1</b>                                            | <b>Image 2</b>                                            | <b>Image 3</b>                                           |
|----------------------------------------------------|-----------------------------------------------------------|-----------------------------------------------------------|----------------------------------------------------------|
| Plane group symmetry                               | <b>p3</b>                                                 | <b>p3</b>                                                 | <b>p3</b>                                                |
| Unit cell parameters                               | <b>a=b= 56.27 ± 0.06<br/><math>\gamma</math>= 120.01°</b> | <b>a=b= 56.28 ±0.15 Å<br/><math>\gamma</math>=120.23°</b> | <b>a=b= 55.92 ±0.37<br/><math>\gamma</math>= 120.04°</b> |
| Range of Defocus (Å)                               | <b>376645-38544</b>                                       | <b>32985- 32210</b>                                       | <b>36284-37924</b>                                       |
| Total # of unique reflections to 10 Å              | <b>27</b>                                                 | <b>27</b>                                                 | <b>35</b>                                                |
| Overall phase residual to cutoff at 10 Å           | <b>15.291°</b>                                            | <b>11.267 °</b>                                           | <b>14.070 °</b>                                          |

**Supplementary table S1: image statistics for electron cryo-microscopy images of HFB II.**
