# Supplementary material for: Hydrophobin Film Structure for HFBI and HFBII and Mechanism for Accelerated Film Formation
Source: PubMed Central journal article supplement (PMC4117420; doi:10.1371/journal.pcbi.1003745), 2014-07-31
Supplement: pcbi.1003745.s004.pdf [file pcbi.1003745.s004.pdf]

## Supporting Information, Supplementary tables:

| Resolution range (Å)<br>(Micrograph 1) | Number of unique reflections | Phase residual |
|----------------------------------------|------------------------------|----------------|
| 1000.0-20.0                            | 9                            | 8.0°           |
| 20.0-14.1                              | 9                            | 19.9°          |
| 14.1- 11.5                             | 4                            | 17.4°          |
| 11.5-10.0                              | 5                            | 18.5°          |

| Resolution range (Å)<br>(Micrograph 2) | Number of unique reflections | Phase residual |
|----------------------------------------|------------------------------|----------------|
| 1000.0-18.0                            | 12                           | 8.1°           |
| 18.0-12.7                              | 5                            | 0.6°           |
| 12.7- 10.4                             | 8                            | 14.5°          |
| 10.4-9.0                               | 2                            | 43.6°          |

| Resolution range (Å)<br>(Micrograph 3) | Number of unique reflections | Phase residual |
|----------------------------------------|------------------------------|----------------|
| 1000.0-18.0                            | 15                           | 8.6°           |
| 18.0-12.7                              | 8                            | 13.3°          |
| 12.7- 10.4                             | 12                           | 21.4°          |
| 10.4 -9.0                              | 0                            | 0°             |

Supplementary table S2: number of unique reflections and phase residuals in each resolution range.
