# Supplementary material for: Hydrophobin Film Structure for HFBI and HFBII and Mechanism for Accelerated Film Formation
Source: PubMed Central journal article supplement (PMC4117420; doi:10.1371/journal.pcbi.1003745), 2014-07-31
Supplement: pcbi.1003745.s005.pdf [file pcbi.1003745.s005.pdf]

## Supporting Information, Supplementary tables:

| HFB1 $\alpha$ |          |            | HFB1 $\beta$ |          |            | HFBII |          |            |
|---------------|----------|------------|--------------|----------|------------|-------|----------|------------|
| Donor         | Acceptor | Percentage | Donor        | Acceptor | Percentage | Donor | Acceptor | Percentage |
| GLN70         | GLN22    | 49.77      | LYS32        | ASP30    | 70.08      | THR5  | PRO29    | 61.40      |
| THR21         | PRO10    | 33.62      | ASN6         | ALA72    | 43.46      | GLY6  | ASN10    | 45.91      |
| THR71         | ALA72    | 32.23      | SER35        | GLY52    | 31.99      | VAL2  | PRO29    | 27.97      |
| GLY25         | GLN70    | 31.86      | LYS32        | CYS18    | 29.62      | ALA1  | ASP34    | 25.84      |
| ASN4          | ASN6     | 31.50      | THR21        | VAL33    | 29.52      | THR5  | ASN10    | 25.59      |
| GLN22         | PRO10    | 30.59      | ASN37        | SER35    | 23.58      | GLY36 | ASP34    | 25.40      |
| GLY3          | LYS50    | 29.20      | GLN65        | GLN65    | 28.25      | THR5  | PRO11    | 24.64      |
| ASN37         | ALA49    | 27.58      | ARG45        | ASP40    | 20.28      | SER48 | ASN17    | 24.51      |
| LYS32         | ASN2     | 24.25      | GLN65        | ALA63    | 20.18      | ILE22 | THR28    | 24.27      |
| LEU12         | GLN22    | 22.60      |              |          |            | ALA1  | VAL33    | 22.81      |
| ASN2          | THR51    | 22.44      |              |          |            |       |          |            |
| GLY11         | SER14    | 21.08      |              |          |            |       |          |            |

Supplementary Table S3. The H-bonds and salt bridges (highlighted in green) between proteins in both structures of HFB I and the structure for HFB II present for more than 20 % of the trajectory. Note the dominant salt bridge between LYS32 and ASP30 in the HFB1 $\beta$
